# Supplementary material
Source: publisher site journal article supplement (https://www.dovepress.com/article/426901)
Supplement: Supplementary file 1 [file get_supplementary_file.php]

**Table S1** Primers used to amplify of capsular serotyping, resistance and virulence-associated genes in this study

| Gene | Primer name | Primer sequence (5’–3’) | Product size (bp) |
| --- | --- | --- | --- |
| *blaTEM* | TEM-F | ATAAAATTCTTGAAGACGAAA | 1080 |
| TEM-R | GACAGTTACCAATGCTTAATCA |
| *blaSHV* | SHV-F | CGCCGGGTTATTCTTATTTGTCGC | 1017 |
| SHV-R | TCT TTCCGATGCCGCCGCCAGTCA |
| *blaCTX-M-1* group | CTX-M-1-F | CAGCGCTTTTGCCGTCTAAGC | 945 |
| CTX-M-1-R | GGCCCATGGTTAAAAAATCACTGC |
| *blaCTX-M-2* group | CTX-M-2-F | CTC AGA GCA TTC GCC GCT CA | 848 |
| CTX-M-2-R | CCG CCG CAG CCA GAA TAT CC |
| *blaCTX-M-8* group | CTX-M-8-F | ACTTCAGCCACACGGATTCA | 1024 |
| CTX-M-8-R | CGA GTA CGT CAC GAC GAC TT |
| *blaCTX-M-9* group | CTX-M-9-F | GTT ACA GCC CTT CGG CGA TGA TTC | 881 |
| CTX-M-9-R | GCG CAT GGT GAC AAA GAG AGTGCAA |
| *blaKPC* | KPC-F | ATG TCA CTG TAT CGC CGT C | 882 |
| KPC-R | TTA CTG CCC GTT GAC GCC |
| *blaNDM* | NDM-F | GAAGCTGAGCACCGCATTAG | 982 |
| NDM-R | GGGCCGTATGAGTGATTGC |
| *blaVIM* | VIM-F | GCMCTTCTCGCGGAGATTGA | 257 |
| VIM-R | TGCGCAGCACCRGGATAGA |
| *blaIMP* | IMP-F | CTACCGCAGCAGAGTCTTTG | 587 |
| IMP-R | AACCAGTTTTGCCTTACCAT |
| *blaOXA-48* | OXA48-F | TTGGTGGCATCGATTATCGG | 743 |
| OXA48-R | GAGCACTTCTTTTGTGATGGC |
| *blaCMY* | CMY-F | TGGCCAGAACTGACAGGCAAA | 462 |
| CMY-R | TTTCTCCTGAACGTGGCTGGC |
| *blaDHA* | DHA-F | AACTTTCACAGGTGTGCTGGGT | 405 |
| DHA-R | CCGTACGCATACTGGCTTTGC |
| *wzi* | wzi-F | GTGCCGCGAGCGCTTTCTATCTTGGTATTCC | 447 |
| wzi-R | GAGAGCCACTGGTTCCAG AATTACCGC |
| *aerobactin* | aerobactin-F | GCATAGGCGGATACGAACAT | 556 |
| aerobactin-R | CACAGGGCAATTGCTTACCT |
| *rmpA* | rmpA-F | CATAAGAGTATTGGTTGACAG | 429 |
| rmpA-R | CTTGCATGAGCCATCTTTCA |
| *rmpA2* | rmpA2-F | TGTGCAATAAGGATGTTACATTAGT | 609 |
| rmpA2-R | TTTGATGTGCACCATTTTTCA |
| *magA* | magA-F | GGTGCTCTTTACATCATTGC | 1283 |
| magA-R | GCAATGGCCATTTGCGTTAG |
| *kfu* | kfu-F | ATAGTAGGCGAGCACCGAGA | 530 |
| kfu-R | AGAACCTTCCTCGCTGAACA |
| *allS* | allS-F | CCGAAACATTACGCACCTTT | 508 |
| allS-R | ATCACGAAGAGCCAGGTCAC |
| *ybtS* | ybt-F | GACGGAAACAGCACGGTAAA | 782 |
| ybt-R | GAGCATAATAAGGCGAAAGA |
| *entB* | entB-F | GTCAACTGGGCCTTTGAGCCGTC | 400 |
| entB-R | TATGGGCGTAAACGCCGGTGAT |
| *fimH* | fimH-F | TGCTGCTGGGCTGGTCGATG | 609 |
| fimH-R | GGGAGGGTGACGGTGACATC |
| *mrkD* | mrkD-F | AAGCTATCGCTGTACTTCCGGCA | 340 |
| mrkD-R | GGCGTTGGCGCTCAGATAGG |
| *iroN* | iroN-F | GTCCGGCGGTAACTTCAGCC | 829 |
| iroN-R | TCAGAATGAAACTACCGCCC |
| *iucA* | iucA-F | AATCAATGGCTATTCCCGCTG | 239 |
| iucA-R | CGCTTCACTTCTTTCACTGACAGG |


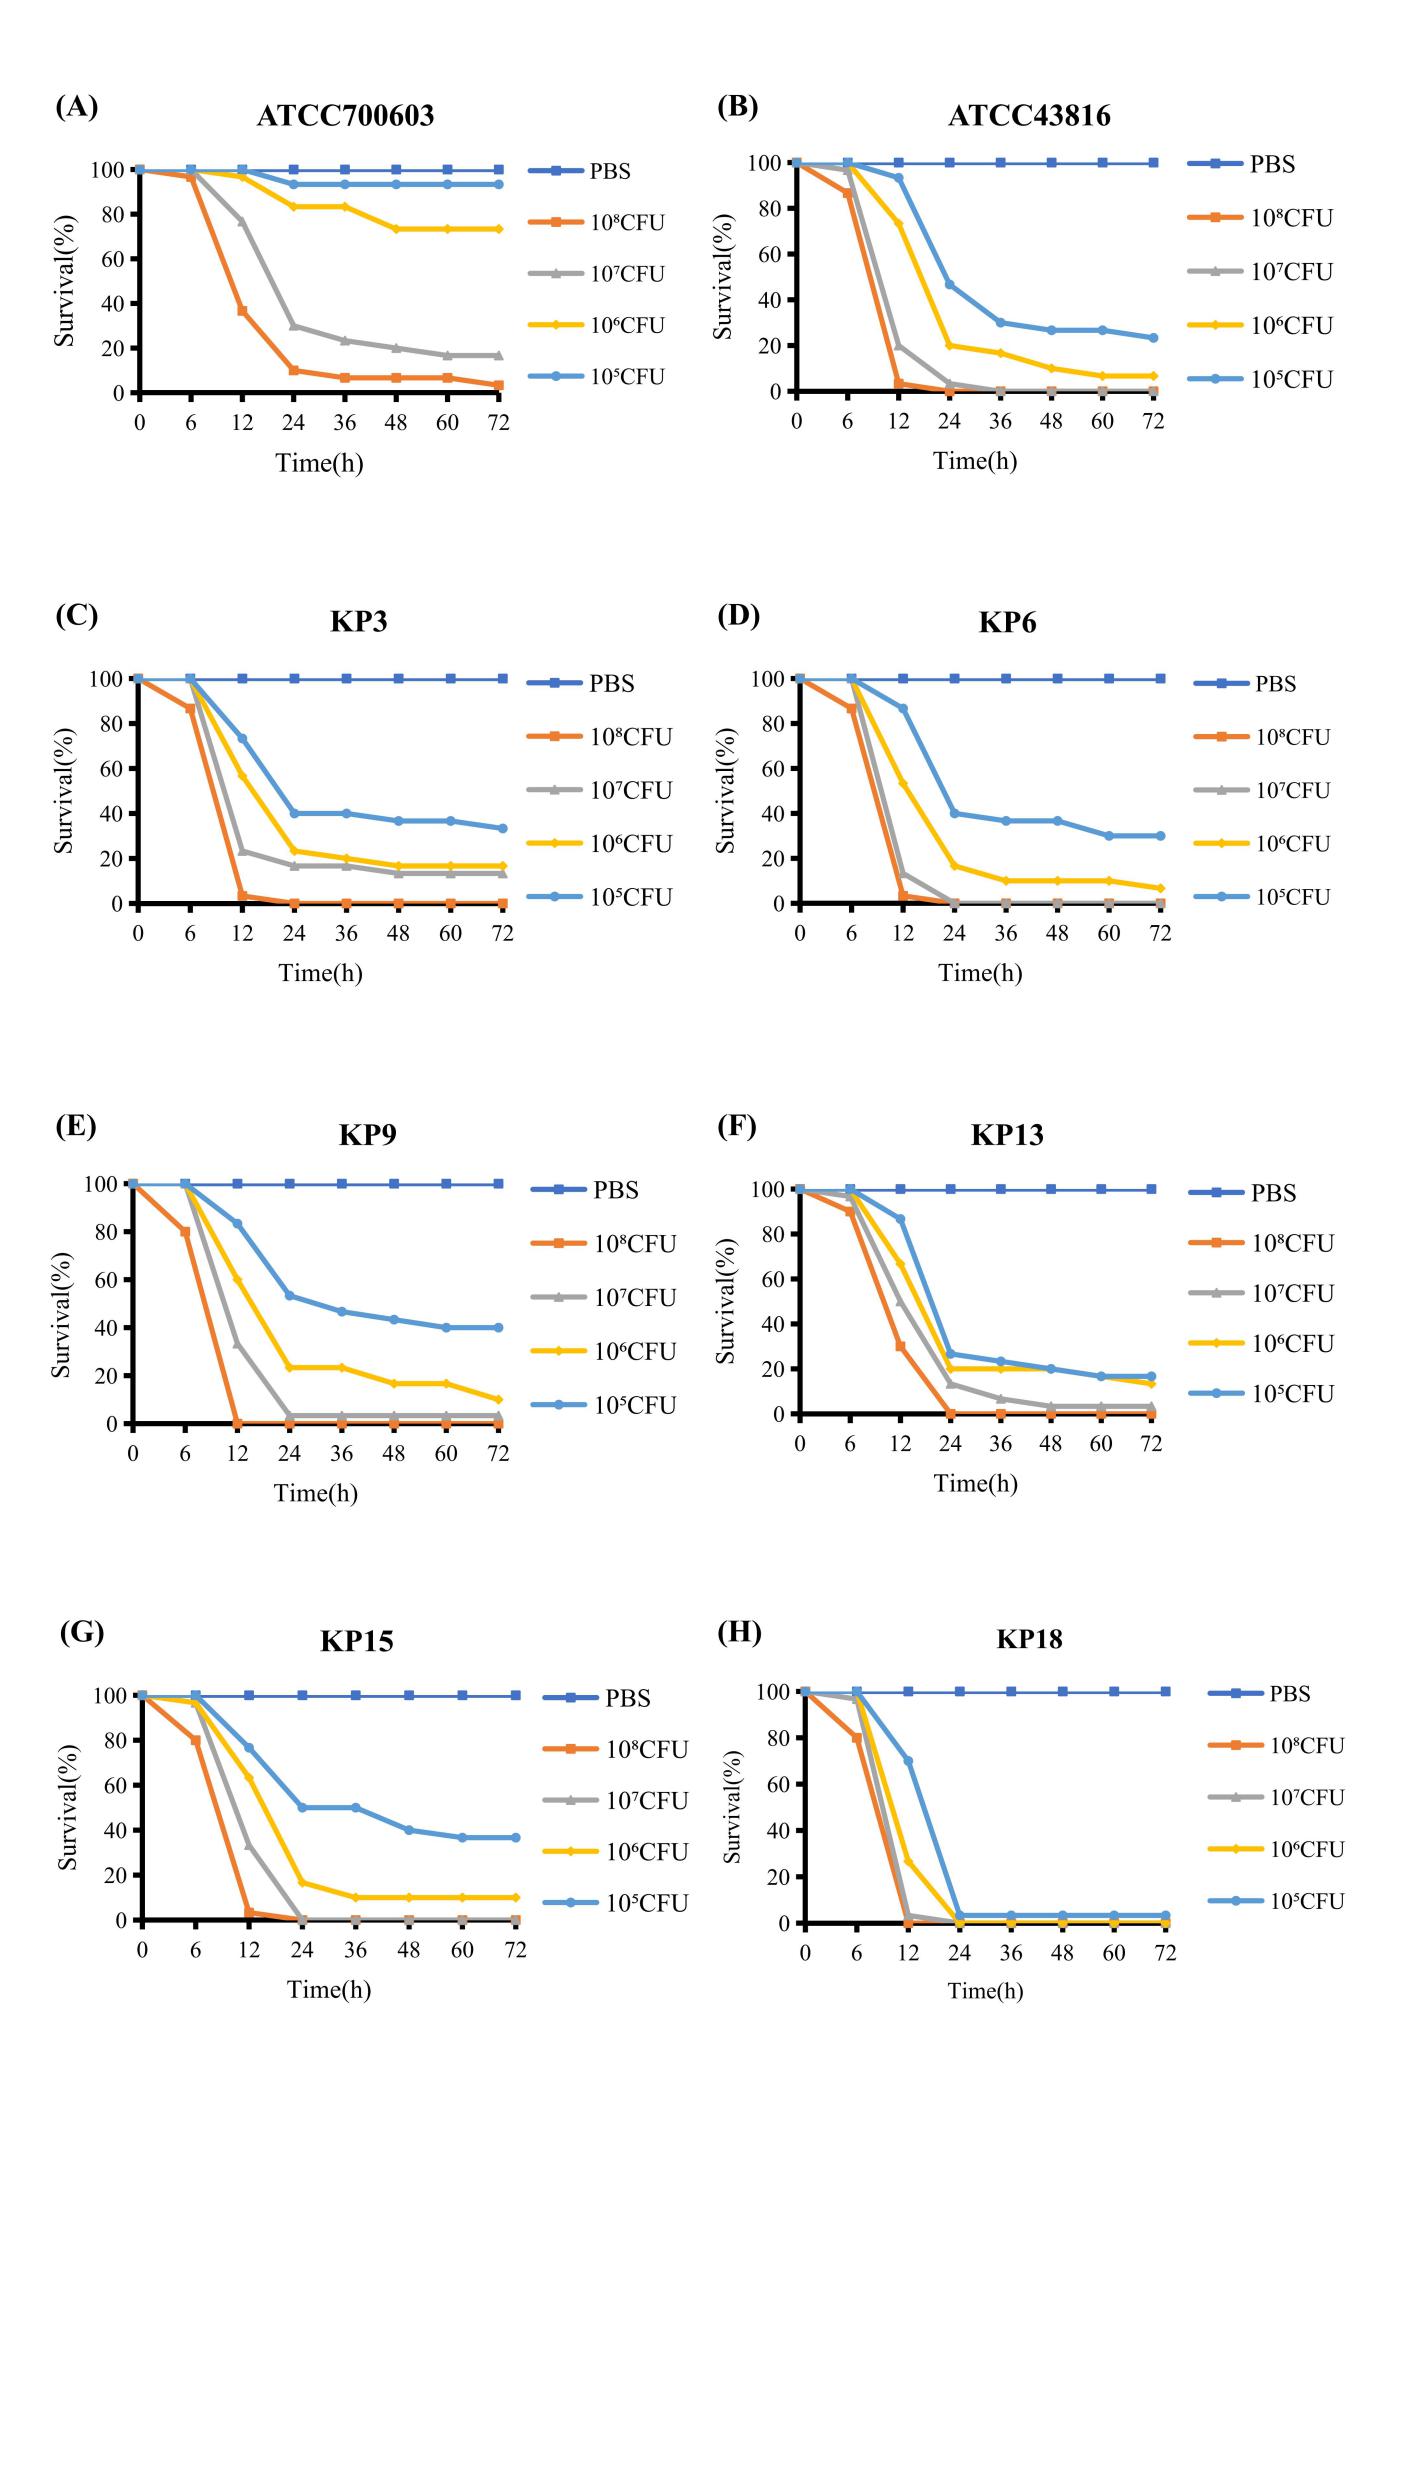


**Fig S1** Larvae were injected with PBS or with 105, 106, 107 or 108 CFU/mL of KP3, KP6, KP9, KP13, KP15, KP18, ATCC700603 or ATCC43816. The survival rate of *G. mellonella* larvae was calculated after 72 hours of infection. (A)virulence assay of low virulence standard strain ATCC700603, (B)virulence assay of high virulence standard strain ATCC43816, (C)virulence assay of clinical strain KP3, (D)virulence assay of clinical strain KP6, (E)virulence assay of clinical strain KP9, (F)virulence assay of clinical strain KP13, (G)virulence assay of clinical strain KP15, (H)virulence assay of clinical strain KP18.
